# Supplementary material for: Divergent sensory investment mirrors potential speciation via niche partitioning across Drosophila
Source: eLife. 2020 Jun 30;9:e57008. doi: 10.7554/eLife.57008 (PMC7402680; doi:10.7554/eLife.57008)
Supplement: Figure 1—source data 1. [file elife-57008-fig1-data1.xlsx]

## Sheet: Ommat Counts
Ommatidia counts							Palp measurements																Antenna surface area (front view)
	Dpseudoobscura				Dsubobscura		Dpseudoobscura				Dsubobscura					21.37% increase							Dpseudoobscura				Dsubobscura
Dpse 1	873			dsub 1	1272		Dpse 1	8427			dsub 1	Not visible											Dpse 1	13809	15303		dsub 1	12714
Dpse 2	975			dsub 2	1171		Dpse 2	8817			dsub 2	6485											Dpse 2	13291	15893		dsub 2	15833	14239
Dpse 3	1046			dsub 3	1350		Dpse 3	9318			dsub 3	10970											Dpse 3	16666	17081		dsub 3	12339	12533
Dpse 4	943			dsub 4	1234		Dpse 4	8622			dsub 4	10857											Dpse 4	13882	13156		dsub 4	15886	13172
Dpse 5	1055			dsub 5	1258		Dpse 5	10761			dsub 5	9551											Dpse 5	15430	14666		dsub 5	14773	13296
Dpse 6	1040			dsub 6	1187		Dpse 6	11842			dsub 6	9782											Dpse 6	15679			dsub 6	12918	11899
Dpse 7	883			dsub 7	1157		Dpse 7	8973			dsub 7	10420											Dpse 7	13263	11554		dsub 7	12012	11751
Dpse 8	936			dsub 8	1228		Dpse 8	9162			dsub 8	10215											Dpse 8	14434			dsub 8	14652
average	968.875				1232.12		average	9490.25				9754.29											average	14556.8	14608.8			13890.9	12815
Eye surface area (side view)							Antenna surface area (side view)																average	14582.8			average	13352.9
Dpseudoobscura				Dsubobscura			Dpseudoobscura				Dsubobscura													9.21% decrease
Dpse 1	137508			dsub 1	217443		Dpse 1	14811			dsub 1	17189
Dpse 2	156508			dsub 2	177955		Dpse 2	14624			dsub 2	13532
Dpse 3	168722			dsub 3	206555		Dpse 3	13672			dsub 3	14888
Dpse 4	150996			dsub 4	204846		Dpse 4	13220			dsub 4	17023
Dpse 5	187013			dsub 5	193309		Dpse 5	14378			dsub 5	12500
Dpse 6	177616			dsub 6	188451		Dpse 6	14237			dsub 6	15435											Need antenna surface FRONT view
Dpse 7	135426			dsub 7	194248		Dpse 7	12111			dsub 7	14052
Dpse 8	145249			dsub 8	182368		Dpse 8	9199			dsub 8	13146											Need to measure OCELLI
average	157380				195647		average	13281.5				14720.6
																19.56% increase
Ommatidia counts
	Dpersimilis				Dbifasciata				Daffinis
	ommatidia	surface area			ommatidia	surface area			ommatidia	surface area
Dper1	1155	196575		Dbif1	1125	157908		Daff1	1092	189591
Dper2	1161	195813		Dbif2	1203	186051		Daff2	1123	185181
Dper3	1133	187265		Dbif3	1220	197183		Daff3	1086	183070
Dper4	1164	197211		Dbif4	1238	196945		Daff4	1141	195377
Dper5	1160	193539		Dbif5	1151	185978		Daff5	1122	192259
									1091	182646
average	1154.6				1187.4				1109.17

## Sheet: body
	Dpseudoobscura						Dsubobscura						Dpse						Dsub
													HEAD	ommat	ant surface				HEAD	ommat	ant surface
reps	HEAD	Thorax	Abdomen	tibia		reps	HEAD	Thorax	Abdomen	tibia
1	247381	707146	860303	4080.26		1	330459	910023	1.22353e+06	4458.84			247381	873	13809				330459	1272	12714
2	245236	686114	892440	3785.8		2	301350	839102	1.00744e+06	3827.87			245236	975	13291				301350	1171	15833
3	313885	916291	1.15379e+06	4080.26		3	318512	822823	997433	4491.35			313885	1046	16666				318512	1350	12339
4	332730	884448	1.00328e+06	3585.03		4	343120	1.06036e+06	1.31645e+06	4332.64			332730	943	13882				343120	1234	15886
5	257687	744541	869094	3827.87		5	346233	895090	1.14954e+06	4491.35			257687	1055	15430				346233	1258	14773
6	321457	854288	946072	3690.58		6	346107	1.08169e+06	1.2971e+06	3617.55			321457	1040	15679				346107	1187	12918
7	304883	931771	1.01392e+06	4585.03		7	316031	972447	971185	4743.74			304883	883	13263				316031	1157	12012
8	285239	774702	890926	4206.45		8	335548	915996	869894	4575.48			285239	936	14434				335548	1228	14652
9	335170	832540	943002	3837.42		9	352627	929583	1.16523e+06	3701.68			335170		15303				352627		14239
						10	316912	923694	1.15892e+06	3954.06					15893				316912		12533
	293741	814649	952536	3964.3											17081						13172
							330690	935081	1.11567e+06	4219.46					13156						13296
															14666						11899
															11554						11751
												ave	293741	968.875	14639.7				332221	1232.12	13929.6
													ratio	0.0032984	0.0498387				ratio	0.00370875	0.0419286

## Sheet: population (eye)
Frontal Views
				1	2	3		1	2	3	4		1	2	3		1	2	3		1	2	3	4
				D.sub 16	D.sub 04	D.sub 05		D.pseob 00	D.pseob 03	D.pseob 100	D.pseob 116		D.aff 00	D.aff 05	D.aff 09		D.per 00	D.per 41	D.per 63		D.bif E-12733	D.bif E-12701	D.bif E-12710	D.bif 02
eye	height
			1	539.436	555.047	557.997		499.718	499.383	515.918			521.9	477.781	535.75		513.042	540.91	519.383		526.551	555.356	527.115
			2	560.234	520.962	548.346		473.721	494	512.649			498	490.144	510.202		526.865	533.915	514.565		535.468	565.105	540.274
			3	528.857	563.458	530.124		478.388	512.466	526.24			521.7	501.026	526.087		511.619	534.58	541.848		521.986	574.663	532.851
			4	548.803	533.582	566.44		473.216	467.577	521.504			520.6	477.88	536.002		535.15	544.302	524.094		524.754	558.011	517.537
			5	520.649	548.505	543.257		461.553	494.678	509.65				501.233	542.599		518.149	527.436	516.247		530.695	569.447	511.739
			6	518.156	551.04	523.296		465.659	478.868	496.354				501.158	545.883			504.986	520.13		532.256	573.485	511.445
			7		557.495	544.876		480.128	486.416	545.618				494.163	549.077			490.217	497.942		534.645		535.251
			8		557.017	556.555			484.779	526.213				486.409	543.291						537.577		563.933
			9											507.517							520.462
			10																		548.137
eye	width
			1	262.589	291.695	269.733		240.385	260.817	251.284			284.1	260.725	278.026		277.388	283.36	264.654		308.148	290.008	295.946
			2	290.504	278.798	277.442		242.703	251.925	263			294.3	257.873	274.095		284.25	279.346	271.873		301.812	295.65	308.751
			3	272.3	297.903	274.4		245.684	253.901	288.514			281.3	272.543	271.059		279.634	280.843	279.124		299.765	302.344	305.867
			4	281.704	294.408	290.861		242.79	260.038	277.173			287.9	262.424	293.938		262.478	285.486	276.172		308.818	273.76	294.252
			5	279.457	290.285	273.106		242.818	256.394	260.525				265.361	287.793		279.305	269.697	266.8		304.692	297.688	309.997
			6	274.145	287.933	261.566		240.992	242.024	271.632				263.222	292.609			254.981	279.145		296.784	294.563	297.781
			7		287.356	267.235		245.247	248.333	281.55				281.218	287.336			249.225	272.538		296.919		305.678
			8		292.272	285.551			258.177	283.121				259.562	289.711						302.774		310.459
			9											274.72							304.929
			10																		301.438
radius			1	266.153	284.609	274.366		245.122	255.254	254.621			272.525	249.808	272.951		266.954	276.907	262.173		285.712	283.843	279.752
			2	285.31	269.639	275.807		239.782	249.462	259.662			271.65	251.473	264.598		273.841	273.152	264.577		284.773	289.101	289.444
			3	268.364	289.816	269.731		242.439	255.067	275.817			271.075	261.528	267.051		267.721	274.067	275.024		280.379	294.838	286.146
			4	278.053	280.599	287.04		239.699	246.913	268.962			274.1	250.682	280.969		265.027	278.818	269.11		285.597	276.383	276.51
			5	269.89	282.269	272.367		236.797	251.867	257.675				257.989	279.546		269.19	266.707	262.462		285.019	291.206	282.933
			6	266.611	281.726	261.607		236.911	240.729	259.904				256.9	282.775			253.737	269.605		281.456	290.653	276.752
			7		283.051	269.837		242.656	245.771	277.179				264.15	280.937			247.166	260.754		282.121		286.651
			8		285.39	281.914			250.283	273.114				251.383	280.678			0			285.781		296.212
			9											264.239							282.58
			10																		287.753
PI			3.142
3D eye surface			1	445144	509019	473039		377573	409432	407404			466712	392146	468171		447827	481842	431928		512970	506283	491793
			2	511530	456881	478022		361300	391062	423695			463720	397391	439956		471231	468861	439888		509606	525214	526460
			3	452570	527814	457191		369353	408832	478056			461759	429805	448153		450404	472007	475310		494000	546264	514532
			4	485837	494777	517752		361051	383111	454589			472122	394895	496082		441383	488516	455087		512560	480019	480462
			5	457732	500683	466172		352362	398638	417235				418251	491071		455358	446998	432882		510487	532889	503041
			6	446677	498760	430066		352700	364160	424486				414731	502479			404579	456764		497804	530866	481300
			7		503462	457549		370013	379573	482790				438467	495969			383898	427267		500157		516351
			8		511816	499425			393640	468731				397107	495055						513220		551369
			9											438763							501787
			10																		520327
	AVERAGE			466581	500401	472402		363479	391056	444623			466078	413506	479617		453241	449529	445589		507292	520256	508164
						479795				399719					453067				449453				511904
	pseob	399719
	per	449453
	aff	453067
	bif	511904
	subob	479795

## Sheet: population (ant)
Frontal Views
				1	2	3		1	2	3	4		1	2	3		1	2	3		1	2	3	4
				D.sub 16	D.sub 04	D.sub 05		D.pseob 00	D.pseob 03	D.pseob 100	D.pseob 116		D.aff 00	D.aff 05	D.aff 09		D.per 00	D.per 41	D.per 63		D.bif E-12733	D.bif E-12701	D.bif E-12710	D.bif 02
funiculus	length		1	145	158.578	159.065		145.5	148.197	171.638			159.707	147.519	157.537		173.78	154.918	160.993		154.821	168.984	165.202
			2	160.044	152.82	156.531		160.625	156.538	164.966			159.482	155.714	165.994		174.248	165.363	155.949		162.182	168.723	154.942
			3	149.505	158.054	147.492		165.964	154.357	179.052			141.421	137.26	164.665		170.577	164.356	163.115		168.438	162.531	168.392
			4	147.899	147.921	152.808		161.868	157.82	180.225			166.9	145.343	165.693		175.606	156.892	164.586		164.303	163.571	160.454
			5	150.351	155.331	154.504		160.607	154.242	178.564				157.706	156.543		177.121	150.908	173.699		164.295	168.567	157.183
			6	154.101	157.421	152.781		158.917	143.849	162.23				146.345	156.401			160.173	168.962		169.252	170.707	164.493
			7		151.098	148.003		161.081	150.82	185.119				153.813	162.299			161.692			155.259		166.79
			8		159.388	166.915			147.435	179.166				153.801	161.115						159.978		160.766
			9																		141.445
			10																		150.103
funiculus	width		1	102.4	112.895	116.103		112.9	122.295	122.809			114.563	109.039	120.626		123.054	126.155	131.609		128.707	124.38	113.665
			2	107.936	111.095	110.024		112.993	125.63	120.239			115.073	116.407	115.377		123.884	130.322	135.972		131.851	123.627	114.312
			3	105.528	111.95	125.34		116.007	117.951	123.481			104.04	104.74	119.324		122.404	131.142	124.797		138.614	128.008	135.783
			4	107.846	105.675	126.06		114.875	131.211	124.772			109.416	109.41	116.371		119.093	135.15	120.101		119.158	119.464	118.391
			5	108.406	109.726	115.352		110.85	131.165	123.851				108.566	110.901		122.618	129.979	121.49		127.538	126.52	132.48
			6	112.885	111.642	102.145		115.422	122.016	137.677				118.355	131.465			124.061	126.236		119.779	121.798	128.808
			7		117.162	113.203		123.511	127.708	128.827				104.393	110.716			118.817			131.242		123.194
			8		113.618				124.183	115.55				105.639	120.492						138.27		121.272
			9																		127.879
			10																		125.072
radius a			1	51.2	56.4477	58.0517		56.45	61.1475	61.4045			57.2815	54.5195	60.3128		61.5272	63.0775	65.8047		64.3535	62.1902	56.8323
			2	53.9682	55.5475	55.0122		56.4963	62.815	60.1197			57.5367	58.2035	57.6885		61.942	65.161	67.986		65.9255	61.8135	57.156
			3	52.7638	55.9748	62.67		58.0037	58.9753	61.7405			52.02	52.37	59.662		61.2022	65.5712	62.3985		69.307	64.004	67.8913
			4	53.9232	52.8377	63.03		57.4375	65.6055	62.3858			54.7082	54.705	58.1857		59.5463	67.575	60.0505		59.579	59.7322	59.1955
			5	54.2032	54.863	57.6758		55.4248	65.5825	61.9257				54.283	55.4507		61.3092	64.9895	60.745		63.7688	63.26	66.2398
			6	56.4425	55.8208	51.0725		57.7108	61.008	68.8385				59.1775	65.7327			62.0307	63.1178		59.8895	60.8992	64.4038
			7		58.581	56.6015		61.7557	63.8542	64.4133				52.1965	55.358			59.4087			65.621		61.5968
			8		56.809				62.0913	57.775				52.8197	60.2458						69.135		60.6362
			9																		63.9397
			10																		62.5362
diameter			1	123.7	135.737	137.584		129.2	135.246	147.224			137.135	128.279	139.081		148.417	140.537	146.301		141.764	146.682	139.433
			2	133.99	131.958	133.278		136.809	141.084	142.603			137.278	136.061	140.685		149.066	147.843	145.961		147.016	146.175	134.627
			3	127.516	135.002	136.416		140.986	136.154	151.266			122.73	121	141.994		146.491	147.749	143.956		153.526	145.27	152.087
			4	127.873	126.798	139.434		138.371	144.515	152.498			138.158	127.377	141.032		147.349	146.021	142.344		141.731	141.518	139.423
			5	129.379	132.529	134.928		135.728	142.703	151.208				133.136	133.722		149.87	140.444	147.595		145.916	147.543	144.832
			6	133.493	134.531	127.463		137.169	132.932	149.953				132.35	143.933			142.117	147.599		144.516	146.253	146.65
			7		134.13	130.603		142.296	139.264	156.973				129.103	136.507			140.255			143.25		144.992
			8		136.503	166.915			135.809	147.358				129.72	140.803						149.124		141.019
			9																		134.662
			10																		137.588
radius b			1	61.85	67.8684	68.7922		64.6	67.6231	73.6118			68.5674	64.1396	69.5406		74.2086	70.2684	73.1505		70.882	73.3411	69.7166
			2	66.9951	65.9789	66.6388		68.4044	70.542	71.3015			68.6389	68.0304	70.3427		74.533	73.9213	72.9803		73.5081	73.0874	67.3136
			3	63.7582	67.501	68.208		70.4928	68.0769	75.6331			61.3651	60.4999	70.9971		73.2455	73.8746	71.978		76.763	72.6349	76.0436
			4	63.9363	63.399	69.717		69.1856	72.2576	76.2491			69.0791	63.6883	70.5161		73.6746	73.0104	71.1718		70.8653	70.7589	69.7113
			5	64.6893	66.2643	67.4639		67.8641	71.3516	75.6039				66.5679	66.8612		74.935	70.2218	73.7973		72.9581	73.7717	72.4158
			6	66.7465	67.2655	63.7316		68.5845	66.4661	74.9766				66.175	71.9665			71.0585	73.7994		72.2578	73.1264	73.3251
			7		67.0649	65.3016		71.1481	69.6321	78.4864				64.5515	68.2537			70.1274			71.6252		72.4959
			8		68.2515	83.4575			67.9044	73.679				64.8601	70.4015						74.562		70.5095
			9																		67.3312
			10																		68.794
PI		3.142
surface area			1	48077.9	57889.7	59476.5		52448.3	57472	68102.1			59088.3	51703.4	60777.6		69211	62056.3	67251.3		63144.9	67602.3	61085.6
radius b			2	56409.5	54711.2	55811		58807.7	62540.6	63894.5			59211.6	58166.4	62187.8		69817.4	68676	66938.6		67910.5	67135.3	56947.2
			3	51090.2	57264.6	58470.5		62453.3	58245.9	71893.6			47327	46001.8	63350.2		67426.1	68589.4	65112.7		74057.7	66306.6	72676.1
			4	51376.2	50516.2	61086.3		60158.6	65619.6	73069.5			59973.6	50978.2	62494.7		68218.5	66993.9	63662.2		63115	62925.7	61076.2
			5	52593.4	55185.5	57201.7		57882.4	63984.4	71838				55692.4	56184.3		70572.5	61974	68445.8		66898.1	68398.5	65907.1
			6	55991.6	56865.8	51047.7		59117.8	55522.2	70650.9				55036.9	65091.9			63459.7	68449.7		65619.8	67207	67572.8
			7		56527.1	53593.8		63619.9	60937.6	77420.3				52369.6	58549			61807.5			64476.1		66053
			8		58545.1	87538.1			57951.1	68226.6				52871.5	62291.7						69871.7		62482.9
			9																		56977
			10																		59479.5
proximal base area			1	8236.56	10011.5	10588.6		10012.3	11748	11847			10309.4	9339.21	11429.4		11894.4	12501.3	13605.7		13012.2	12152.1	10148.4
radius a			2	9151.27	9694.72	9508.78		10028.7	12397.5	11356.4			10401.5	10644	10456.5		12055.3	13340.8	14522.6		13655.7	12005.3	10264.3
			3	8747.4	9844.43	12340.3		10571.1	10928.1	11977			8502.5	8617.3	11184.1		11769	13509.3	12233.6		15092.5	12871.2	14482.2
			4	9136.02	8771.92	12482.5		10365.7	13523.4	12228.6			9403.98	9402.87	10637.5		11140.8	14347.6	11330.2		11153	11210.5	11009.9
			5	9231.14	9457.26	10451.8		9651.92	13513.9	12048.9				9258.36	9660.98		11810.2	13270.7	11593.8		12776.8	12573.7	13786.2
			6	10009.6	9790.33	8195.59		10464.5	11694.4	14889.1				11003.2	13575.9			12089.8	12517.3		11269.6	11652.8	13032.5
			7		10782.5	10066.1		11982.9	12811.1	13036.4				8560.3	9628.68			11089.4			13529.8		11921.2
			8		10140.1				12113.4	10487.8				8765.95	11404						15017.7		11552.4
			9																		12845.4
			10																		12287.7
3D funiculus surface			1	39841.3	47878.2	48887.9		42436	45724.1	56255.1			48778.8	42364.2	49348.1		57316.6	49555	53645.6		50132.7	55450.2	50937.2
			2	47258.2	45016.4	46302.2		48778.9	50143.1	52538.1			48810	47522.4	51731.3		57762.1	55335.2	52416		54254.8	55130	46682.9
			3	42342.8	47420.2	46130.2		51882.2	47317.8	59916.6			38824.5	37384.5	52166		55657.1	55080.1	52879.1		58965.2	53435.3	58194
			4	42240.1	41744.3	48603.8		49793	52096.2	60840.9			50569.6	41575.4	51857.2		57077.7	52646.3	52331.9		51962	51715.2	50066.3
			5	43362.3	45728.2	46749.8		48230.5	50470.4	59789.1				46434	46523.3		58762.3	48703.3	56851.9		54121.3	55824.7	52120.9
			6	45982	47075.4	42852.1		48653.3	43827.8	55761.8				44033.7	51516			51369.9	55932.4		54350.2	55554.2	54540.3
			7		45744.6	43527.6		51637	48126.5	64383.9				43809.3	48920.3			50718.1			50946.2		54131.8
			8		48405				45837.7	57738.7				44105.6	50887.6						54854		50930.6
			9																		44131.6
			10																		47191.8
	AVERAGE			43504.5	46126.5	46150.5		48773	47942.9	58403			46745.7	43403.6	50368.7		57315.2	51915.4	54009.5		52091	54518.3	52200.5
						45260.5				51706.3					46839.4				54413.4				52936.6
	pseob	51706.3
	per	54413.4
	aff	46839.4
	bif	52936.6
	subob	45260.5

## Sheet: EF Ratio
				1	2	3		1	2	3	4		1	2	3		1	2	3		1	2	3	4
				D.sub 16	D.sub 04	D.sub 05		D.pseob 00	D.pseob 03	D.pseob 100	D.pseob 116		D.aff 00	D.aff 05	D.aff 09		D.per 00	D.per 41	D.per 63		D.bif E-12733	D.bif E-12701	D.bif E-12710	D.bif 02
		Eye		466581	500401	472402		363479	391056	444623			466078	413506	479617		453241	449529	445589		507292	520256	508164
		Ant		43504.5	46126.5	46150.5		48773	47942.9	58403			46745.7	43403.6	50368.7		57315.2	51915.4	54009.5		52091	54518.3	52200.5
		EF Ratio		10.7249	10.8484	10.2361		7.45246	8.1567	7.61302			9.97049	9.527	9.52212		7.90787	8.65887	8.2502		9.73857	9.54278	9.73484
					average	10.6032			average	7.74072				average	9.6732			average	8.27231			average	9.67206
			3D eye	445144	509019	473039		377573	409432	407404			466712	392146	468171		447827	481842	431928		512970	506283	491793
				511530	456881	478022		361300	391062	423695			463720	397391	439956		471231	468861	439888		509606	525214	526460
				452570	527814	457191		369353	408832	478056			461759	429805	448153		450404	472007	475310		494000	546264	514532
				485837	494777	517752		361051	383111	454589			472122	394895	496082		441383	488516	455087		512560	480019	480462
				457732	500683	466172		352362	398638	417235				418251	491071		455358	446998	432882		510487	532889	503041
				446677	498760	430066		352700	364160	424486				414731	502479			404579	456764		497804	530866	481300
					503462	457549		370013	379573	482790				438467	495969			383898	427267		500157		516351
					511816	499425			393640	468731				397107	495055						513220		551369
														438763							501787
																					520327
			3D ant	39841.3	47878.2	48887.9		42436	45724.1	56255.1			48778.8	42364.2	49348.1		57316.6	49555	53645.6		50132.7	55450.2	50937.2
				47258.2	45016.4	46302.2		48778.9	50143.1	52538.1			48810	47522.4	51731.3		57762.1	55335.2	52416		54254.8	55130	46682.9
				42342.8	47420.2	46130.2		51882.2	47317.8	59916.6			38824.5	37384.5	52166		55657.1	55080.1	52879.1		58965.2	53435.3	58194
				42240.1	41744.3	48603.8		49793	52096.2	60840.9			50569.6	41575.4	51857.2		57077.7	52646.3	52331.9		51962	51715.2	50066.3
				43362.3	45728.2	46749.8		48230.5	50470.4	59789.1				46434	46523.3		58762.3	48703.3	56851.9		54121.3	55824.7	52120.9
				45982	47075.4	42852.1		48653.3	43827.8	55761.8				44033.7	51516			51369.9	55932.4		54350.2	55554.2	54540.3
					45744.6	43527.6		51637	48126.5	64383.9				43809.3	48920.3			50718.1			50946.2		54131.8
					48405				45837.7	57738.7				44105.6	50887.6						54854		50930.6
																					44131.6
																					47191.8
			EF ratio	11.1729	10.6315	9.676		8.89747	8.95441	7.24207			9.56792	9.25655	9.48711		7.81322	9.72338	8.0515		10.2322	9.1304	9.65488
				10.8241	10.1492	10.3239		7.40688	7.79893	8.06452			9.5005	8.36218	8.50463		8.15814	8.47311	8.39224		9.39283	9.52682	11.2774
				10.6882	11.1306	9.91089		7.11906	8.64014	7.97868			11.8935	11.4969	8.59089		8.09249	8.56947	8.98863		8.37783	10.2229	8.84167
				11.5018	11.8526	10.6525		7.25104	7.35392	7.47177			9.33609	9.4983	9.56631		7.73302	9.2792	8.69616		9.86413	9.28196	9.59653
				10.556	10.9491	9.97162		7.3058	7.89844	6.97846				9.00744	10.5554		7.74916	9.17798	7.61419		9.43229	9.54575	9.65143
				9.71417	10.5949	10.0361		7.24925	8.30888	7.61249				9.41848	9.75386			7.87579	8.16635		9.15919	9.55582	8.82468
					11.0059	10.5117		7.16565	7.88699	7.49861				10.0085	10.1383			7.56924			9.81735		9.53877
					10.5736				8.58771	8.11813				9.00356	9.7284						9.3561		10.8259
																					11.3702
																					11.0258
				10.7429	10.8609	10.1547		7.48502	8.17868	7.62059			10.0745	9.50649	9.54061		7.90921	8.66688	8.31818		9.8028	9.54394	9.7764
						10.5862				7.76143					9.7072				8.29809				9.70771

## Sheet: Correlations
	OLD									NEW
	(w/o populations)									(w/ 3 pops per species)
	7.74255	2								7.74072	2
	7.89864	11								8.27231	11
	9.97052	31								9.67206	31
	10.1449	36								9.6732	36
	10.7169	51								10.6032	51
	7.74255	16								7.74072	16
	7.89864	39								8.27231	39
	9.97052	58								9.67206	58
	10.1449	54								9.6732	54
	10.7169	76								10.6032	76
	EF ratio	11.1729	10.6315	9.676		8.89747	8.95441	7.24207			9.56792	9.25655	9.48711		7.81322	9.72338	8.0515		10.2322	9.1304	9.65488
		10.8241	10.1492	10.3239		7.40688	7.79893	8.06452			9.5005	8.36218	8.50463		8.15814	8.47311	8.39224		9.39283	9.52682	11.2774
		10.6882	11.1306	9.91089		7.11906	8.64014	7.97868			11.8935	11.4969	8.59089		8.09249	8.56947	8.98863		8.37783	10.2229	8.84167
		11.5018	11.8526	10.6525		7.25104	7.35392	7.47177			9.33609	9.4983	9.56631		7.73302	9.2792	8.69616		9.86413	9.28196	9.59653
		10.556	10.9491	9.97162		7.3058	7.89844	6.97846				9.00744	10.5554		7.74916	9.17798	7.61419		9.43229	9.54575	9.65143
		9.71417	10.5949	10.0361		7.24925	8.30888	7.61249				9.41848	9.75386			7.87579	8.16635		9.15919	9.55582	8.82468
			11.0059	10.5117		7.16565	7.88699	7.49861				10.0085	10.1383			7.56924			9.81735		9.53877
			10.5736				8.58771	8.11813				9.00356	9.7284						9.3561		10.8259
																			11.3702
																			11.0258
		10.7429	10.8609	10.1547		7.48502	8.17868	7.62059			10.0745	9.50649	9.54061		7.90921	8.66688	8.31818		9.8028	9.54394	9.7764
				10.5862				7.76143					9.7072				8.29809				9.70771

## Sheet: Courtship
percentage of recording time spent in front of female
	Dpseob	Dper	Daff	Dbif	Dsubob
	2	4	35	41	35
	5	13	36	26	41
	8	6	27	39	58
	0	14	33	34	49
	4	22	27	49	66
	1	11	25	28	50
	0	10			47
	7				53
	3				39
	0				62
	0				60
mean	2.73	11.43	30.5	36.17	50.91
SD	2.936	5.884	4.722	8.612	10.005
SEM	0.8851	2.224	1.928	3.516	3.016
ANOVA	p < 0.0001

## Sheet: pop comparisons
		1	2	3		1	2	3	4		1	2	3		1	2	3		1	2	3	4
		D.sub 16	D.sub 04	D.sub 05		D.pseob 00	D.pseob 03	D.pseob 100	D.pseob 116		D.aff 00	D.aff 05	D.aff 09		D.per 00	D.per 41	D.per 63		D.bif E-12733	D.bif E-12701	D.bif E-12710	D.bif 02
	3D eye	445144	509019	473039		377573	409432	407404			466712	392146	468171		447827	481842	431928		512970	506283	491793
		511530	456881	478022		361300	391062	423695			463720	397391	439956		471231	468861	439888		509606	525214	526460
		452570	527814	457191		369353	408832	478056			461759	429805	448153		450404	472007	475310		494000	546264	514532
		485837	494777	517752		361051	383111	454589			472122	394895	496082		441383	488516	455087		512560	480019	480462
		457732	500683	466172		352362	398638	417235				418251	491071		455358	446998	432882		510487	532889	503041
		446677	498760	430066		352700	364160	424486				414731	502479			404579	456764		497804	530866	481300
			503462	457549		370013	379573	482790				438467	495969			383898	427267		500157		516351
			511816	499425			393640	468731				397107	495055						513220		551369
												438763							501787
																			520327
	3D ant	39841.3	47878.2	48887.9		42436	45724.1	56255.1			48778.8	42364.2	49348.1		57316.6	49555	53645.6		50132.7	55450.2	50937.2
		47258.2	45016.4	46302.2		48778.9	50143.1	52538.1			48810	47522.4	51731.3		57762.1	55335.2	52416		54254.8	55130	46682.9
		42342.8	47420.2	46130.2		51882.2	47317.8	59916.6			38824.5	37384.5	52166		55657.1	55080.1	52879.1		58965.2	53435.3	58194
		42240.1	41744.3	48603.8		49793	52096.2	60840.9			50569.6	41575.4	51857.2		57077.7	52646.3	52331.9		51962	51715.2	50066.3
		43362.3	45728.2	46749.8		48230.5	50470.4	59789.1				46434	46523.3		58762.3	48703.3	56851.9		54121.3	55824.7	52120.9
		45982	47075.4	42852.1		48653.3	43827.8	55761.8				44033.7	51516			51369.9	55932.4		54350.2	55554.2	54540.3
			45744.6	43527.6		51637	48126.5	64383.9				43809.3	48920.3			50718.1			50946.2		54131.8
			48405				45837.7	57738.7				44105.6	50887.6						54854		50930.6
																			44131.6
																			47191.8

## Sheet: Ommat Dia
Ommatidia Diameter
	Dpse a_f	Dpse b_f	Dpse c_f	Dpse d_f	Dpse e_f		Dsub f_f	Dsub g_f	Dsub h_f	Dsub i_f	Dsub j_f		Daff aj_f	Daff ak_f	Daff al_f	Daff am_f	Daff an_f
	16.759	15.718	15.296	15.827	16.402		15.785	15.857	16.544	15.154	16.239		16.245	15.841	16.477	16.157	15.606
	16.451	16.358	15.711	15.789	15.901		15.536	15.934	16.456	15.776	16.023		16.45	16.179	16.281	15.684	15.675
	16.461	16.354	15.922	16.047	15.627		15.615	15.97	16.367	15.612	16.443		16.553	17.153	16.907	16.106	15.674
	16.553	15.715	15.825	15.746	16.091		15.419	15.418	16.372	15.821	16.664		16.864	15.809	16.166	16.395	15.749
	16.93	15.563	15.759	15.866	15.462		15.636	15.868	16.451	15.309	16.142		16.487	15.161	16.368	15.854	15.609
		15.193
	Dper o_f	Dper p_f	Dper q_f	Dper r_f	Dper s_f		Dbif aa_f	Dbif ab_f	Dbif ac_f	Dbif ad_f	Dbif ae_f
	15.247	15.59	16.443	16.337	15.879		16.427	15.529	16.505	15.298	15.176
	15.821	15.828	16.029	15.705	15.706		16.5	15.574	15.83	15.336	15.765
	15.382	15.513	16.307	15.727	15.963		16.124	15.493	16.582	15.789	15.36
	16.154	15.709	16.403	15.965	16.215		15.874	15.871	15.887	15.912	15.14
	16.169	16.037	16.365	15.913	16.37		15.843	15.78	16.295	15.707	15.051
