# Supplementary material for: Divergent sensory investment mirrors potential speciation via niche partitioning across Drosophila
Source: eLife. 2020 Jun 30;9:e57008. doi: 10.7554/eLife.57008 (PMC7402680; doi:10.7554/eLife.57008)
Supplement: Figure 2—source data 1. [file elife-57008-fig2-data1.xlsx]

## Sheet: Sheet1
Species	Specimen	Antennal Lobe		Hemisphere	Medulla	Lobula	Lobula plate		OL		TOTAL [µm³]	total (AL+OL+Hemi)			Antennal Lobe	Hemisphere	Medulla	Lobula	Lobula plate	OL	TOTAL [µm³]
Drosophila subobscura	190509a		115254	1.22897e+06	965306	140879	216786		1.32297e+06		2.45041e+06	2.6672e+06		Drosophila subobscura	109171	1.19231e+06	861933	145071	208898	1.2159e+06	3.73328e+06
	190509d		119554	1.26546e+06	774274	150758	228593		1153625		2.31005e+06	2.53864e+06			14421.7	96840.9	96480.9	5106.68	24606.6	93136.3	142719
	190509i		92704.2	1.08249e+06	846219	143574	181314		1.17111e+06		2.16498e+06	2.3463e+06
Drosophila pseudoobscura	190522a	70650.4	74608.6	1.04306e+06	483237	114309	163481		761027		1.87869e+06	1.87869e+06		Drosophila pseudoobscura	75240.5	1.07791e+06	546441	116287	170357	833085	2.81932e+06
		78566.8													3397.73	56016.4	66260.2	8277.83	20912.3	90458.7	94319.7
	190522b	71579.7	72203	1.04814e+06	615384	125375	193842		934600		2.05494e+06	2.05494e+06
		72826.4
	190522d	78909.8	78909.8	1.14252e+06	540701	109178	153748		803627		2.02506e+06	2025058
OL : AL RATIO
Drosophila subobscura	190509a	11.4788
	190509d	9.64936
	190509i	12.6327
Drosophila pseudoobscura	190522a	10.2003
	190522b	12.9441
	190522d	10.1841
																						AL	OL
BRAIN PERCENTAGE		Antennal Lobe	Optic Lobe					AL	OL												Dpseob	3.79387	41.891
Drosophila subobscura	190509a	4.70345	53.9898		0.00895587			4.32116	49.6016												Dsubob	4.72028	52.6741
	190509d	5.17541	49.9394					4.70939	45.4426
	190509i	4.28198	54.0931					3.95108	49.913
Drosophila pseudoobscura	190522a	3.9713	40.5083					3.9713	40.5083													AL	OL
	190522b	3.51363	45.4807					3.51363	45.4807												Dpseob	14.3252	0.77489
	190522d	3.89667	39.6842					3.89667	39.6842												Dsubob	10.9749	1.02333
HEMISPHERE RELATION		AL	OL	AL/Hemi x100	OL/Hemi x100
Drosophila subobscura	190509a	10.6632	1.07649	9.37808	107.649																	AL	OL
	190509d	10.5848	0.911624	9.4475	91.1624																Dpseob	14.3252	77.489
	190509i	11.6768	1.08187	8.564	108.187																Dsubob	10.9749	102.333
Drosophila pseudoobscura	190522a	13.9804	0.72961	7.15286	72.961
	190522b	14.5165	0.891679	6.88871	89.1679
	190522d	14.4788	0.703381	6.90664	70.3381
	stdev AL	0.609092	0.096775	0.491275	9.6775
	stdev AL	0.299226	0.101989	0.147605	10.1989
	medula : hemi				lobula : hemi				lob plate : hemi
		medulla				lobula				LP
	Dpseob	50.7888			Dpseob	10.8255			Dpseob	15.8747
	Dsubob	72.6349			Dsubob	12.2133			Dsubob	17.4845
		medulla (sub)	medulla (pse)		lobula (sub)	lobula (pse)			LP (sub)	LP (pse)
		78.5459	46.3288		11.4632	10.959			17.6396	15.6732
		61.1851	58.7122		11.9133	11.9617			18.064	18.4939
		78.1736	47.3252		13.2634	9.55586			16.7498	13.457
			p = 0.03			ns				ns
