# Supplementary material for: Divergent sensory investment mirrors potential speciation via niche partitioning across Drosophila
Source: eLife. 2020 Jun 30;9:e57008. doi: 10.7554/eLife.57008 (PMC7402680; doi:10.7554/eLife.57008)
Supplement: Figure 4—source data 1. [file elife-57008-fig4-data1.xlsx]

## Sheet: Choice
Y tube
Horizontal, single flies
	Dsubobscura						Dsubobscura						Dpseudoobscura						Dpseudoobscura
	male						female						male						female
	dark	light	time	seconds			dark	light	time	seconds			dark	light	time	seconds			dark	light	time	seconds
1		1	08:45:00	525		1	1		04:13:00	253		1		1	00:18:00	18		1	1		02:17:00	137							Dpseudoobscura					Dsubobscura
2		1	02:12:00	132		2	1		01:58:00	118		2	1		02:31:00	151		2		1	05:22:00	322								dark	light	total			dark	light	total
3		1	01:57:00	117		3		1	06:41:00	401		3	1		01:47:00	107		3	1		03:15:00	195							male	31	6	37		male	8	26	34
4	1		10:00:00	600		4		1	03:28:00	208		4	1		04:01:00	241		4		1	00:41:00	41							female	29	9	38		female	11	25	36
5		1	02:18:00	138		5		1	02:59:00	179		5	1		00:09:00	9		5		1	00:53:00	53
6		1	01:13:00	73		6		1	02:16:00	136		6		1	03:35:00	215		6	1		03:58:00	238
7	1		01:44:00	104		7		1	02:33:00	153		7	1		01:09:00	69		7	1		01:18:00	78
8		1	10:00:00	600		8		1	06:27:00	387		8	1		03:35:00	215		8	1		04:33:00	273
9		1	03:31:00	211		9	1		02:53:00	173		9		1	01:07:00	67		9		1	03:03:00	183
10		1	04:26:00	266		10		1	01:12:00	72		10	1		02:11:00	131		10	1		01:28:00	88
11		1	04:05:00	245		11		1	03:40:00	220		11	1		01:16:00	76		11	1		09:01:00	541
12		1	01:12:00	72		12	1		06:47:00	407		12	1		00:10:00	10		12	1		04:19:00	259
13		1	03:07:00	187		13		1	05:35:00	335		13	1		10:00:00	600		13	1		04:27:00	267
14	1		00:11:00	11		14	1		07:01:00	421		14	1		02:28:00	148		14	1		01:33:00	93
15	1		00:19:00	19		15		1	04:56:00	296		15		1	01:01:00	61		15		1	04:25:00	265
16		1	04:20:00	260		16	1		04:31:00	271		16	1		03:53:00	233		16		1	03:29:00	209
17		1	00:10:00	10		17	1		02:21:00	141		17		1	05:16:00	316		17	1		00:57:00	57
18	1		06:34:00	394		18		1	04:29:00	269		18	1		03:07:00	187		18	1		02:27:00	147
19		1	08:08:00	488		19		1	04:10:00	250		19	1		02:43:00	163		19	1		01:06:00	66
20	1		01:39:00	99		20		1	03:47:00	227		20	1		01:11:00	71		20		1	04:51:00	291
21		1	02:06:00	126		21		1	08:17:00	497		21	1		04:35:00	275		21	1		03:20:00	200
22		1	04:13:00	253		22		1	03:41:00	221		22	1		02:05:00	125		22	1		03:27:00	207							Dpseudoobscura					Dsubobscura
23		1	00:55:00	55		23		1	02:17:00	137		23	1		03:22:00	202		23	1		01:18:00	78								time					time
24		1	00:42:00	42		24		1	01:55:00	115		24	1		01:08:00	68		24	1		03:40:00	220							male	160.971				male	193.118
25		1	02:49:00	169		25	1		03:09:00	189		25	1		01:38:00	98		25	1		02:37:00	157							female	187.737				female	227.25
26		1	01:12:00	72		26		1	04:39:00	279		26	1		03:47:00	227		26	1		04:02:00	242
27		1	03:50:00	230		27		1	01:02:00	62		27	1		01:08:00	68		27		1	05:16:00	316
28		1	02:15:00	135		28		1	03:39:00	219		28	1		06:31:00	391		28	1		01:29:00	89
29	1		01:27:00	87		29	1		05:28:00	328		29	1		02:55:00	175		29	1		03:45:00	225
30		1	02:16:00	136		30		1	01:16:00	76		30		1	03:09:00	189		30	1		01:03:00	63
31	1		03:52:00	232		31		1	03:22:00	202		31	1		01:02:00	62		31		1	03:52:00	232
32		1	02:40:00	160		32		1	03:51:00	231		32	1		03:24:00	204		32	1		10:00:00	600
33		1	03:36:00	216		33		1	02:18:00	138		33	1		02:03:00	123		33	1		02:02:00	122
34		1	01:42:00	102		34	1		01:30:00	90		34	1		02:58:00	178		34	1		01:19:00	79
						35	1		04:42:00	282		35	1		00:41:00	41		35	1		02:34:00	154
						36		1	03:18:00	198		36	1		02:29:00	149		36	1		02:44:00	164
												37	1		01:04:00	64		37	1		02:03:00	123
																		38	1		01:00:00	60
sum	8	26				sum	11	25				sum	31	6				sum	29	9
																														Dpseudoobscura	Dsubobscura
			time																										male	160.971	193.118		115.384	158.862
			average	193.118						227.25						160.971						187.737							female	187.737	227.25		122.712	106.79
				158.862						106.79						115.384						122.712
