# Supplementary material for: Divergent sensory investment mirrors potential speciation via niche partitioning across Drosophila
Source: eLife. 2020 Jun 30;9:e57008. doi: 10.7554/eLife.57008 (PMC7402680; doi:10.7554/eLife.57008)
Supplement: Figure 5—source data 1. [file elife-57008-fig5-data1.xlsx]

## Sheet: Sheet1
	SPECIMEN	EYE		FUNICULUS			SPECIMEN	EYE		FUNICULUS			EYE		FUNICULUS
		height [µm]	width [µm]	length [µm]	width [µm]			height [µm]	width [µm]	length [µm]	width [µm]		height [µm]	width [µm]	length [µm]	width [µm]
affinis 00	1	522.379	284.107	159.947	115.624	affinis	1	521.916	284.052	159.707	114.563	affinis	515.551	286.891	156.877	110.773
14012-1041.00		521.453	283.996	159.466	113.502
crystal lake	2	498.691	276.314	159.285	126.69		2	498.041	294.307	159.482	115.073
nebraska		497.392	312.3	159.679	103.457
1950	3	518.549	279.9	136.018	112.23		3	521.658	281.346	141.421	104.04
		524.767	282.793	146.823	95.85
	4	520.275	279.66	167.079	111.478		4	520.59	287.858	166.9	109.416
		520.905	296.056	166.721	107.355
	5
	6
	7
	8
	9
	10
	SPECIMEN	EYE		FUNICULUS			SPECIMEN	EYE		FUNICULUS			EYE		FUNICULUS
		height [µm]	width [µm]	length [µm]	width [µm]			height [µm]	width [µm]	length [µm]	width [µm]		height [µm]	width [µm]	length [µm]	width [µm]
affinis 05	1	474.505	275.488	143.128	112.377	affinis	1	477.781	260.725	147.519	109.039	affinis	486.708	263.391	146.831	110.062
14012-1041.05		481.057	245.962	151.911	105.701
iowa river	2	488.156	270.192				2	490.144	257.873
2003		492.133	245.554
	3	492.641	286.133	157.04	117.974		3	501.026	272.543	155.714	116.407
		509.411	258.952	154.389	114.84
	4	473.08	262.353	135.248	104.74		4	477.88	262.424	137.26	104.74
		482.679	262.495	139.271
	5	498.913	284.129	155.287	109.827		5	501.233	265.361	145.343	109.41
		503.552	246.593	135.399	108.993
	6	498.776	274.502	152.92	105.137		6	501.158	263.222	157.706	108.566
		503.54	251.942	162.491	111.995
	7	494.03	291.185	145.646	115.278		7	494.163	281.218	146.345	118.355
		494.296	271.251	147.044	121.432
	8	490.266	274.011	153.813	104.393		8	486.409	259.562	153.813	104.393
		482.551	245.112
	9	503.629	277.139	152.484	107.379		9	507.517	274.72	153.801	105.639
		511.404	272.3	155.118	103.9
	10
	SPECIMEN	EYE		FUNICULUS			SPECIMEN	EYE		FUNICULUS			EYE		FUNICULUS
		height [µm]	width [µm]	length [µm]	width [µm]			height [µm]	width [µm]	length [µm]	width [µm]		height [µm]	width [µm]	length [µm]	width [µm]
affinis 09	1	535.149	298.709	160.079	120.126	affinis	1	535.75	278.026	157.537	120.626	affinis	536.111	284.321	161.281	118.159
14012-1041.09		536.351	257.344	154.995	121.125
connecticut	2	513.083	306.595	166.164	115.87		2	510.202	274.095	165.994	115.377
2007		507.32	241.595	165.824	114.884
	3	521.84	266.171	161.485	117.288		3	526.087	271.059	164.665	119.324
		530.334	275.948	167.844	121.36
	4	539.5	301.643	163.457	116.953		4	536.002	293.938	165.693	116.371
		532.503	286.232	167.929	115.79
	5	539.636	307.707	160.715	111.571		5	542.599	287.793	156.543	110.901
		545.561	267.88	152.372	110.232
	6	548.32	304.343	152.288	123.997		6	545.883	292.609	156.401	131.465
		543.446	280.874	160.513	138.934
	7	551.101	317.16	164.511	115.767		7	549.077	287.336	162.299	110.716
		547.053	257.512	160.087	105.665
	8	543.967	311.494	157.395	127.202		8	543.291	289.711	161.115	120.492
		542.615	267.928	164.834	113.781
	9
	10
	SPECIMEN	EYE		FUNICULUS			SPECIMEN	EYE		FUNICULUS			EYE		FUNICULUS
		height [µm]	width [µm]	length [µm]	width [µm]			height [µm]	width [µm]	length [µm]	width [µm]		height [µm]	width [µm]	length [µm]	width [µm]
bifasciata 1	1	529.614	322.319	154.821	128.707		1	526.551	308.148	156.721	128.707		527.19	304.636	162.911	129.583
E-12733		523.488	293.976
Ehime, Japan	2	533.316	300.973	158.622	124.454		2	535.468	301.812	162.182	131.851
2003		537.62	302.652	165.741	139.248
	3	530.779	307.19	168.438	138.614		3	521.986	299.765	168.438	138.614
		513.193	292.34
	4	529.127	322.728	162.119	120.017		4	524.754	308.818	164.303	119.158
		520.38	294.908	166.487	118.299
	5	533.193	314.926	164.845	123.525		5	530.695	304.692	165.817	127.538
		528.196	294.457	163.745	131.55
	6	525.382	317.479	168.861	120.612		6	532.256	296.784	169.252	119.779
		539.131	276.09	169.643	118.946
	7	535.046	323.44	155.259	131.242		7	534.645	296.919	155.259	131.242
		534.243	270.399
	8	541.235	318.307	159.978	138.27		8	537.577	302.774	159.978	138.27
		533.918	287.241
	9	518.558	322.212	146.509	126.207		9	520.462	304.929	150.103	125.072
		522.366	287.646	153.698	123.938
	10	543.698	336.299	141.78	128.516		10	548.137	301.438	141.445	127.879
		552.575	266.577	141.111	127.243
	SPECIMEN	EYE		FUNICULUS			SPECIMEN	EYE		FUNICULUS			EYE		FUNICULUS
		height [µm]	width [µm]	length [µm]	width [µm]			height [µm]	width [µm]	length [µm]	width [µm]		height [µm]	width [µm]	length [µm]	width [µm]
bifasciata 2	1	555.697	282.237	171.994	123.639		1	555.356	290.008	168.984	124.38		566.011	292.336	167.18	123.966
E-12701		555.016	297.779	165.974	125.122
Hokkaido, Japan	2	567.441	283.866	170.085	123.766		2	565.105	295.65	168.723	123.627
2003		562.769	307.434	167.36	123.488
	3	577.759	300.423	165.995	125.314		3	574.663	302.344	162.531	128.008
		571.568	304.265	159.068	130.702
	4	561.067	284.816	170.547	118.094		4	558.011	273.76	163.571	119.464
		554.955	262.704	156.595	120.835
	5	569.68	308.44	167.906	126.965		5	569.447	297.688	168.567	126.52
		569.214	286.937	169.228	126.075
	6	574.346	299.62	169.111	121.36		6	573.485	294.563	170.707	121.798
		572.623	289.506	172.303	122.237
	7
	8
	9
	10
	SPECIMEN	EYE		FUNICULUS			SPECIMEN	EYE		FUNICULUS			EYE		FUNICULUS
		height [µm]	width [µm]	length [µm]	width [µm]			height [µm]	width [µm]	length [µm]	width [µm]		height [µm]	width [µm]	length [µm]	width [µm]
bifasciata 3	1						1	#DIV/0!	#DIV/0!	#DIV/0!	#DIV/0!		#DIV/0!	#DIV/0!	#DIV/0!	#DIV/0!
	2						2	#DIV/0!	#DIV/0!	#DIV/0!	#DIV/0!
	3						3	#DIV/0!	#DIV/0!	#DIV/0!	#DIV/0!
	4						4	#DIV/0!	#DIV/0!	#DIV/0!	#DIV/0!
	5
	6
	7
	8
	9
	10
	SPECIMEN	EYE		FUNICULUS			SPECIMEN	EYE		FUNICULUS			EYE		FUNICULUS
		height [µm]	width [µm]	length [µm]	width [µm]			height [µm]	width [µm]	length [µm]	width [µm]		height [µm]	width [µm]	length [µm]	width [µm]
bifasciata 4	1	525.161	327.186	164.801	102.853		1	527.115	295.946	165.202	113.665		530.018	303.591	162.278	123.488
14012-0181.02		529.07	264.706	165.603	124.476
	2	540.695	316.277	149.029	105.575		2	540.274	308.751	154.942	114.312
		539.854	301.225	160.856	123.049
	3	529.839	333.692	170.912	128.193		3	532.851	305.867	168.392	135.783
		535.863	278.042	165.872	143.372
	4	512.907	285.334	163.479	106.577		4	517.537	294.252	160.454	118.391
		522.167	303.171	157.429	130.205
	5	518.936	314.722	159.179	132.374		5	511.739	309.997	157.183	132.48
		504.541	305.272	155.188	132.585
	6	507.711	306.449	162.202	133.212		6	511.445	297.781	164.493	128.808
		515.179	289.112	166.784	124.403
	7	530.614	321.848	166.934	123.309		7	535.251	305.678	166.79	123.194
		539.888	289.507	166.646	123.078
	8	562.556	319.778	166.592	108.374		8	563.933	310.459	160.766	121.272
		565.309	301.139	154.939	134.171
	9
	10
	SPECIMEN	EYE		FUNICULUS			SPECIMEN	EYE		FUNICULUS			EYE		FUNICULUS
		height [µm]	width [µm]	length [µm]	width [µm]			height [µm]	width [µm]	length [µm]	width [µm]		height [µm]	width [µm]	length [µm]	width [µm]
persimilis 00	1	508.56	266.883	171.256	122.681		1	513.042	277.388	173.78	123.054		521.669	275.938	173.553	122.109
		517.524	287.893	176.304	123.428
	2	533.236	277.043	172.815	123.931		2	526.865	284.25	174.248	123.884
		520.493	291.458	175.681	123.837
	3	515.012	298.47	171.502	121.822		3	511.619	279.634	170.577	122.404
		508.226	260.797	169.653	122.987
	4	533.716	263.973	176.751	120.314		4	535.15	262.478	175.606	119.093
		536.584	260.984	174.461	117.871
	5	525.861	261.218	176.629	122.336		5	518.149	279.305	177.121	122.618
		510.437	297.392	177.614	122.901
	6						6	#DIV/0!	#DIV/0!	#DIV/0!	#DIV/0!
	7						7	#DIV/0!	#DIV/0!	#DIV/0!	#DIV/0!
	8						8	#DIV/0!	#DIV/0!	#DIV/0!	#DIV/0!
	9
	10
	SPECIMEN	EYE		FUNICULUS			SPECIMEN	EYE		FUNICULUS			EYE		FUNICULUS
		height [µm]	width [µm]	length [µm]	width [µm]			height [µm]	width [µm]	length [µm]	width [µm]		height [µm]	width [µm]	length [µm]	width [µm]
persimilis 41	1	543.461	306.847	157.354	125.022		1	540.91	283.36	154.918	126.155		#DIV/0!	#DIV/0!	#DIV/0!	#DIV/0!
		538.359	259.872	152.483	127.288
	2	535.71	291.249	162.675	129.834		2	533.915	279.346	165.363	130.322
		532.12	267.443	168.051	130.81
	3	535.633	284.931	162.168	129.849		3	534.58	280.843	164.356	131.142
		533.526	276.756	166.544	132.436
	4	548.03	301.6	156.444	141.392		4	544.302	285.486	156.892	135.15
		540.573	269.372	157.339	128.908
	5	528.401	283.768	151.579	129.371		5	527.436	269.697	150.908	129.979
		526.471	255.625	150.237	130.587
	6	504.863	250.711	155.76	126.544		6	504.986	254.981	160.173	124.061
		505.109	259.25	164.585	121.579
	7	489.757	267.338	161.822	117.238		7	490.217	249.225	161.692	118.817
		490.677	231.111	161.562	120.397
	8						8	#DIV/0!	#DIV/0!	#DIV/0!	#DIV/0!
	9
	10
	SPECIMEN	EYE		FUNICULUS			SPECIMEN	EYE		FUNICULUS			EYE		FUNICULUS
		height [µm]	width [µm]	length [µm]	width [µm]			height [µm]	width [µm]	length [µm]	width [µm]		height [µm]	width [µm]	length [µm]	width [µm]
persimilis 63	1	518.318	275.073	159.233	128.66		1	519.383	264.654	160.993	131.609		#DIV/0!	#DIV/0!	#DIV/0!	#DIV/0!
		520.449	254.234	162.752	134.559
	2	516.811	290.898	155.949	135.972		2	514.565	271.873	155.949	135.972
		512.319	252.847
	3	544.014	284.862				3	541.848	279.124
		539.682	273.386
	4	523.293	277.952	163.115	124.797		4	524.094	276.172	163.115	124.797
		524.895	274.392
	5	516.143	274.707	164.586	120.101		5	516.247	266.8	164.586	120.101
		516.351	258.894
	6	517.778	287.903	175.975	121.49		6	520.13	279.145	173.699	121.49
		522.481	270.387	171.423
	7	496.151	298.203	168.671	126.747		7	497.942	272.538	168.962	126.236
		499.732	246.873	169.253	125.724
	8						8	#DIV/0!	#DIV/0!	#DIV/0!	#DIV/0!
	9
	10
	SPECIMEN	EYE		FUNICULUS			SPECIMEN	EYE		FUNICULUS			EYE		FUNICULUS
		height [µm]	width [µm]	length [µm]	width [µm]			height [µm]	width [µm]	length [µm]	width [µm]		height [µm]	width [µm]	length [µm]	width [µm]
pseudoobs 00	1	497.976	222.859	145	112.884		1	499.718	240.385	145.5	112.884		#DIV/0!	#DIV/0!	#DIV/0!	#DIV/0!
		501.46	257.911	146
	2	464.176	251.274	158.458	109.034		2	473.721	242.703	160.625	112.993
		483.265	234.132	162.792	116.951
	3	472.895	215.868	165.805	111.307		3	478.388	245.684	165.964	116.007
		483.881	275.5	166.122	120.708
	4	465.147	192.955	164.683	111.539		4	473.216	242.79	161.868	114.875
		481.286	292.624	159.052	118.211
	5	459.636	242.818	163.731	111.965		5	461.553	242.818	160.607	110.85
		463.47	242.818	157.483	109.734
	6	467.498	230.035	159.336	113.84		6	465.659	240.992	158.917	115.422
		463.819	251.949	158.497	117.003
	7	486.114	232.024	166.058	123.193		7	480.128	245.247	161.081	123.511
		474.143	258.47	156.104	123.83
	8						8	#DIV/0!	#DIV/0!	#DIV/0!	#DIV/0!
	9
	10
	SPECIMEN	EYE		FUNICULUS			SPECIMEN	EYE		FUNICULUS			EYE		FUNICULUS
		height [µm]	width [µm]	length [µm]	width [µm]			height [µm]	width [µm]	length [µm]	width [µm]		height [µm]	width [µm]	length [µm]	width [µm]
pseudoobs 03	1	501.021	284.674	146.475	122.295		1	499.383	260.817	148.197	122.295		493.356	256.67	154.228	124.272
		497.744	236.96	149.92
	2	493.059	270.418	154.792	130.055		2	494	251.925	156.538	125.63
		494.941	233.431	158.284	121.205
	3	504.675	262.577	155.658	113.694		3	512.466	253.901	154.357	117.951
		520.258	245.225	153.056	122.207
	4	468.605	281.441	161.279	130.787		4	467.577	260.038	157.82	131.211
		466.548	238.635	154.36	131.635
	5	491.412	267.257	152.529	132.813		5	494.678	256.394	154.242	131.165
		497.945	245.532	155.954	129.517
	6	476.381	252.287	141.91	122.016		6	478.868	242.024	143.849	122.016
		481.355	231.76	145.787
	7	487.663	257.819	149.906	127.838		7	486.416	248.333	150.82	127.708
		485.169	238.847	151.734	127.579
	8	484.028	269.901	147.614	121.278		8	484.779	258.177	147.435	124.183
		485.53	246.453	147.256	127.087
	9
	10
	SPECIMEN	EYE		FUNICULUS			SPECIMEN	EYE		FUNICULUS			EYE		FUNICULUS
		height [µm]	width [µm]	length [µm]	width [µm]			height [µm]	width [µm]	length [µm]	width [µm]		height [µm]	width [µm]	length [µm]	width [µm]
pseudoobs 100	1	509.307	262.299	173.477	125.88		1	515.918	251.284	171.638	122.809		530.83	272.388	171.588	125.686
		522.528	240.268	169.799	119.738
	2	515.106	262.445	166.187	115.379		2	512.649	263	164.966	120.239
		510.192	263.554	163.746	125.1
	3	525.963	291.163	176.389	122.916		3	526.24	288.514	179.052	123.481
		526.518	285.865	181.714	124.046
	4	520.462	262.706	182.911	128.825		4	521.504	277.173	180.225	124.772
		522.546	291.639	177.539	120.718
	5	578.964	300.356	160.935	110.964	X	5	579.461	267.047	166.587	121.948
		579.957	233.738	172.239	132.931
	6	504.179	261.419	178.008	123.874		6	509.65	260.525	178.564	123.851
		515.122	259.631	179.12	123.829
	7	496.967	283.341	164.112	137.148		7	496.354	271.632	162.23	137.677
		495.741	259.923	160.347	138.206
	8	551.364	282.455	184.579	129.854		8	545.618	281.55	185.119	128.827
		539.872	280.645	185.659	127.799
	9	575.091	301.777	149.286	135.318	X	9	574.696	280.033	148.332	137.708
		574.3	258.288	147.377	140.098
	10	523.514	280.677	181.127	111.453		10	526.213	283.121	179.166	115.55
		528.912	285.565	177.205	119.647
	SPECIMEN	EYE		FUNICULUS			SPECIMEN	EYE		FUNICULUS			EYE		FUNICULUS
		height [µm]	width [µm]	length [µm]	width [µm]			height [µm]	width [µm]	length [µm]	width [µm]		height [µm]	width [µm]	length [µm]	width [µm]
pseudoobs 116	1						1	#DIV/0!	#DIV/0!	#DIV/0!	#DIV/0!		#DIV/0!	#DIV/0!	#DIV/0!	#DIV/0!
	2						2	#DIV/0!	#DIV/0!	#DIV/0!	#DIV/0!
	3						3	#DIV/0!	#DIV/0!	#DIV/0!	#DIV/0!
	4						4	#DIV/0!	#DIV/0!	#DIV/0!	#DIV/0!
	5
	6
	7
	8
	9
	10
	SPECIMEN	EYE		FUNICULUS			SPECIMEN	EYE		FUNICULUS			EYE		FUNICULUS
		height [µm]	width [µm]	length [µm]	width [µm]			height [µm]	width [µm]	length [µm]	width [µm]		height [µm]	width [µm]	length [µm]	width [µm]
subobs 16	1	544.806	279.997	141	102.419		1	539.436	262.589	145	102.419		535.661	277.198	151.15	107.74
		534.065	245.181	149
	2	560.757	321.39	161.409	113.703		2	560.234	290.504	160.044	111.476
		559.711	259.617	158.679	109.248
	3	532.381	250.017	150.235	100.858		3	528.857	272.3	149.505	104.163
		525.333	294.583	148.775	107.469
	4	547.472	289.341	151.651	108.256		4	548.803	281.704	147.899	107.509
		550.133	274.067	144.147	106.762
	5	522.754	287.397	147.026	108.521		5	520.649	279.457	150.351	107.986
		518.543	271.516	153.676	107.45
	6	528.922	313.295	155.223	109.248		6	518.156	274.145	154.101	112.885
		507.389	234.995	152.979	116.522
	7	550.025	247.821				7	533.496	279.69
		516.967	311.56
	8
	9
	10
	SPECIMEN	EYE		FUNICULUS			SPECIMEN	EYE		FUNICULUS			EYE		FUNICULUS
		height [µm]	width [µm]	length [µm]	width [µm]			height [µm]	width [µm]	length [µm]	width [µm]		height [µm]	width [µm]	length [µm]	width [µm]
subobs 04	1	553.195	321.878	158.156	112.408		1	555.047	291.695	158.578	112.895		543.262	290.701	154.343	110.404
		556.898	261.512	159	113.383
	2	521.779	301.076	149.453	112.624		2	520.962	278.798	152.82	111.095
		520.146	256.519	156.188	109.566
	3	560.997	313.897	157.587	112.233		3	563.458	297.903	158.054	111.95
		565.919	281.909	158.522	111.666
	4	535.349	304.198	147.386	101.922		4	533.582	294.408	147.921	105.675
		531.815	284.617	148.455	109.429
	5	549.196	306.347	160.254	107.915		5	548.505	290.285	155.331	109.726
		547.814	274.224	150.408	111.537
	6	548.32	309.934	159.796	107.42		6	551.04	287.933	157.421	111.642
		553.76	265.932	155.045	115.863
	7	553.748	305.943	152.818	117.162		7	557.495	287.356	151.098	117.162
		561.241	268.768	149.377
	8	550.894	305.517				8	551.538	287.173
		552.182	268.828
	9	560.242	302.689	163.982	111.664		9	557.017	292.272	159.388	113.618
		553.792	281.854	154.794	115.572
	10
	SPECIMEN	EYE		FUNICULUS			SPECIMEN	EYE		FUNICULUS			EYE		FUNICULUS
		height [µm]	width [µm]	length [µm]	width [µm]			height [µm]	width [µm]	length [µm]	width [µm]		height [µm]	width [µm]	length [µm]	width [µm]
subobs 05	1	560.092	290.764	153.26	117.096		1	557.997	269.733	159.065	116.103		546.362	274.987	154.762	115.461
		555.903	248.703	164.871	115.111
	2	555.459	301.15	151.127	110.773		2	548.346	277.442	156.531	110.024
		541.233	253.733	161.934	109.276
	3	528.771	288.772	156.657	123.043		3	530.124	274.4	147.492	125.34
		531.477	260.028	138.327	127.637
	4	566.421	306.082	156.458	125.577		4	566.44	290.861	152.808	126.06
		566.459	275.639	149.158	126.543
	5	545.245	286.747	157.793	115.092		5	543.257	273.106	154.504	115.352
		541.269	259.465	151.215	115.611
	6	522.688	271.133	154.204			6	523.296	261.566	152.781
		523.905	251.999	151.359
	7	545.36	282.15	143.831	98.872		7	544.876	267.235	148.003	102.145
		544.392	252.32	152.176	105.418
	8	548.409	308.398	166.915	113.203		8	556.555	285.551	166.915	113.203
		564.701	262.704
	9
	10
