# Supplementary figures and images for: Divergent sensory investment mirrors potential speciation via niche partitioning across Drosophila
Source: eLife journal article supplement (doi:10.7554/elife.57008), 2020-06-30

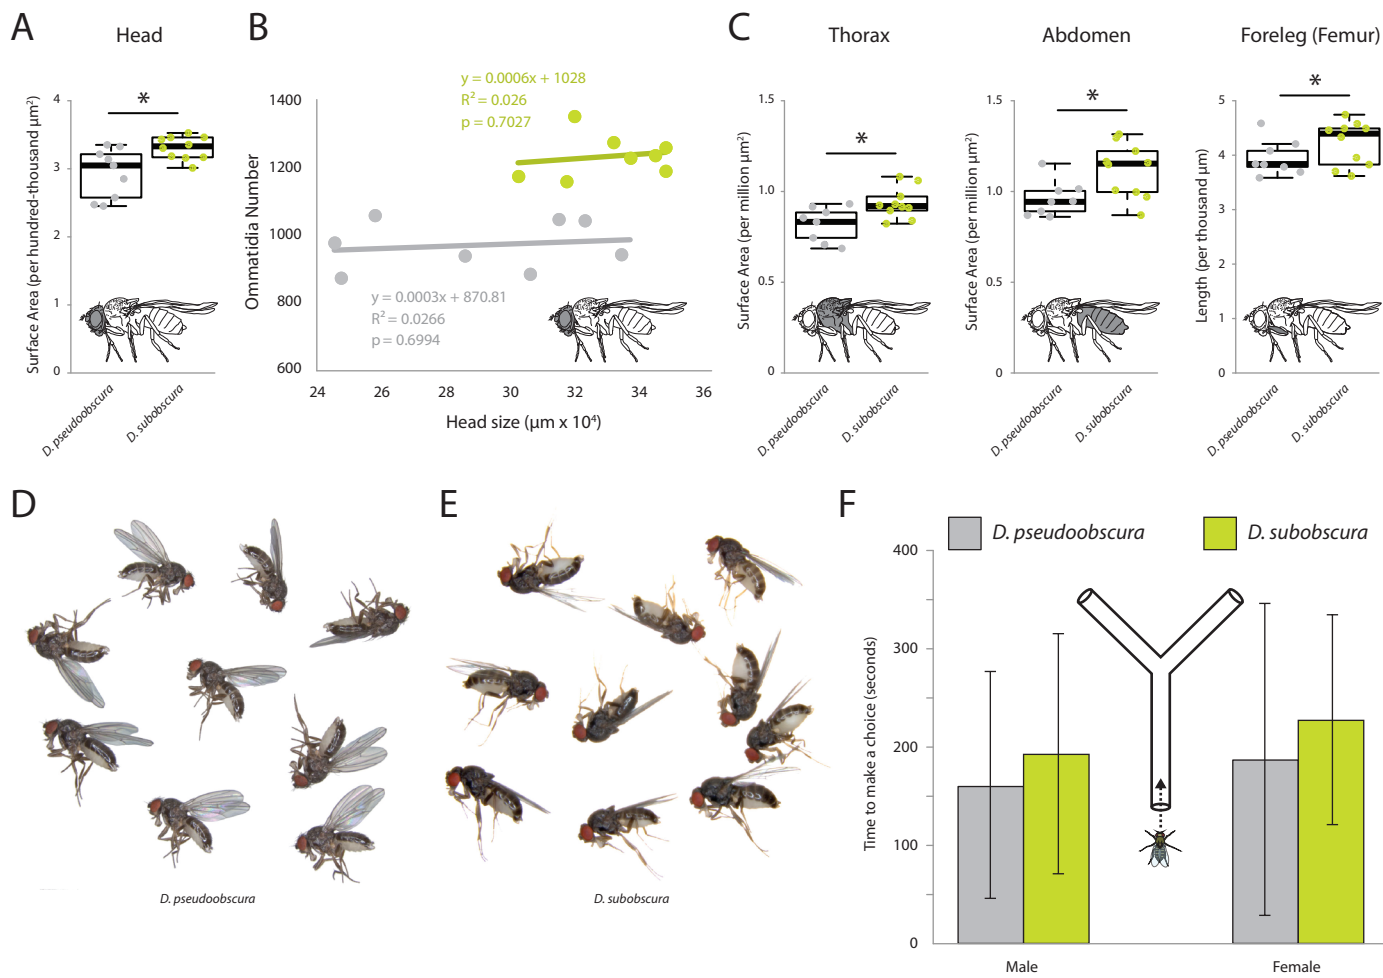

Supplement: supp [file elife_poa_e57008_Figure_1_figure_supplement_1.pdf › elife_poa_e57008_Figure_1_figure_supplement_1.pdf]

A

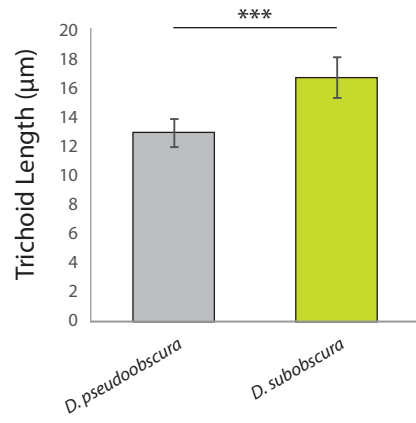

B

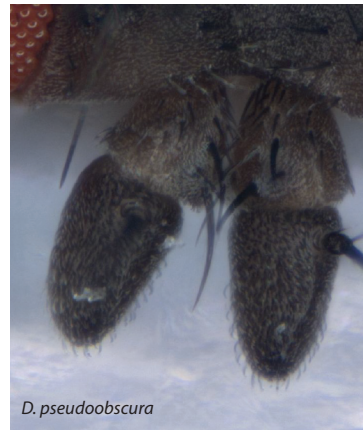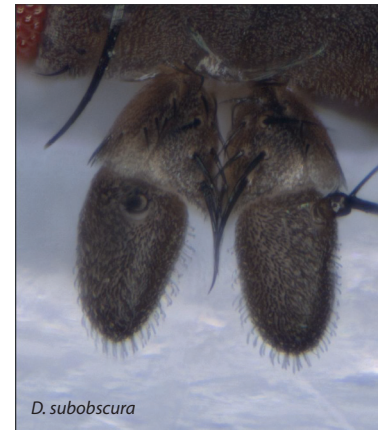

C

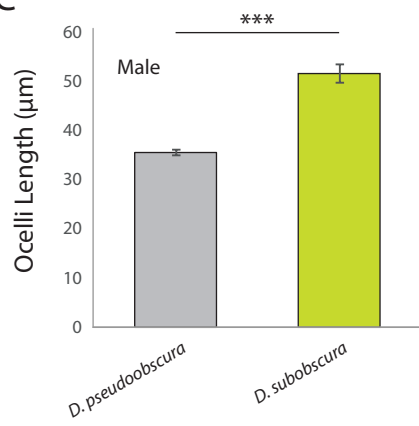

E

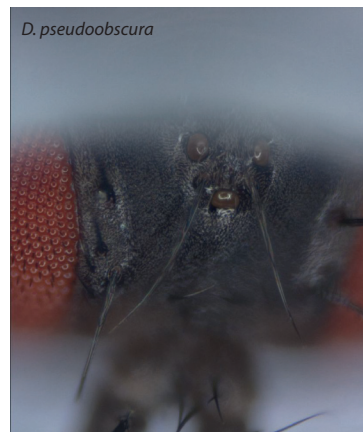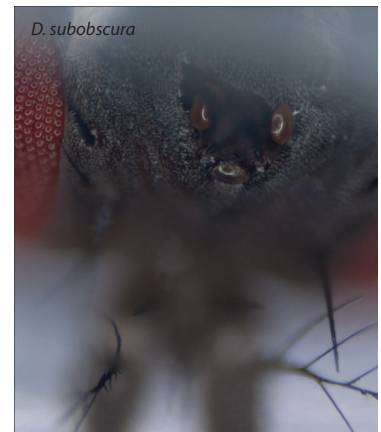

D

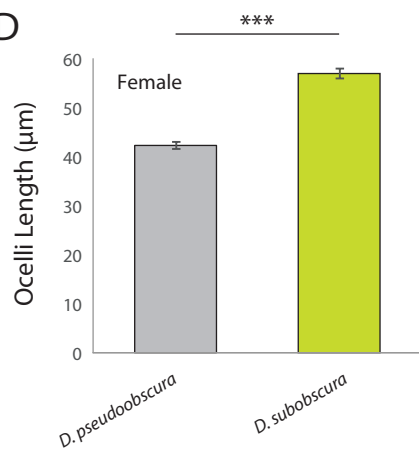

F

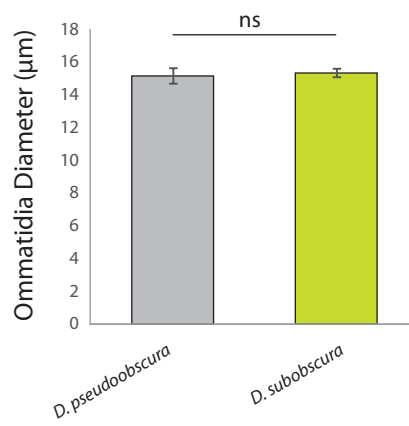

G

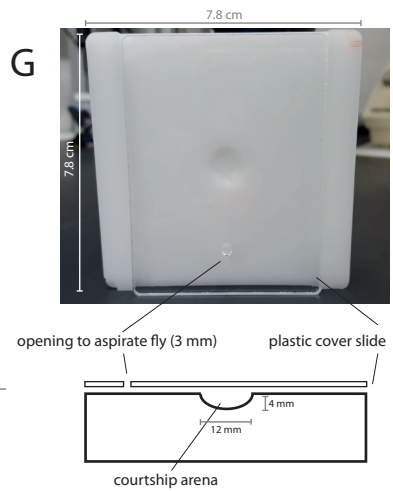

Supplement: supp [file elife_poa_e57008_Figure_1_figure_supplement_2.pdf › elife_poa_e57008_Figure_1_figure_supplement_2.pdf]

A

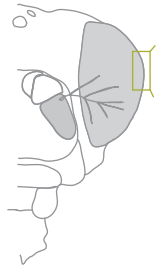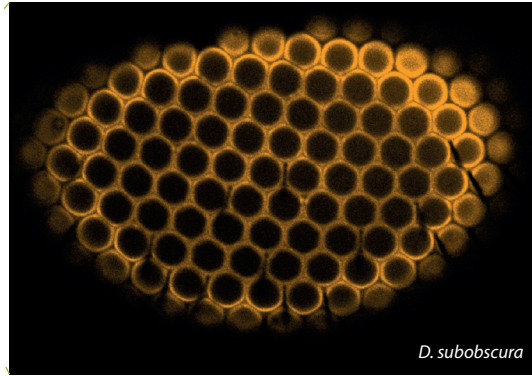

*D. subobscura*

B

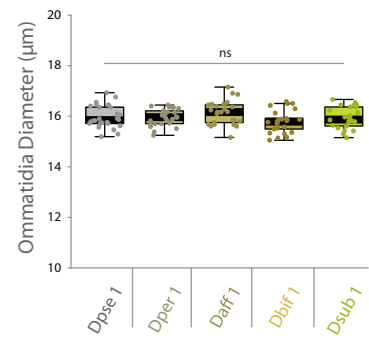

Supplement: supp [file elife_poa_e57008_Figure_1_figure_supplement_3.pdf › elife_poa_e57008_Figure_1_figure_supplement_3.pdf]
